# Supplementary material for: Partitioning of canopy and soil CO 2 fluxes in a pine forest at the dry timberline across a 13-year observation period
Source: Copernicus journal article supplement (doi:10.5194/bg-17-699-2020), 2020-02-11
Supplement: Supplementary file 1 [file bg-17-699-2020-supplement.pdf]

Supplement of Biogeosciences, 17, 699–714, 2020  
<https://doi.org/10.5194/bg-17-699-2020-supplement>  
© Author(s) 2020. This work is distributed under  
the Creative Commons Attribution 4.0 License.

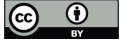

*Supplement of*

## **Partitioning of canopy and soil CO<sub>2</sub> fluxes in a pine forest at the dry timberline across a 13-year observation period**

**Rafat Qubaja et al.**

*Correspondence to:* Dan Yakir ([dan.yakir@weizmann.ac.il](mailto:dan.yakir@weizmann.ac.il))

The copyright of individual parts of the supplement might differ from the CC BY 4.0 License.

1 **Table S1** | Monthly mean values of net ecosystem exchange (NEE), gross primary production (GPP), and ecosystem  
 2 respiration (Re) and soil respiration (Rs) during study period. Note: the numbers in parenthesis is the  $\pm$ se.

| Season                          | Month                                                                 | NEE                                      | GPP                 | Re                 | Rs                 |
|---------------------------------|-----------------------------------------------------------------------|------------------------------------------|---------------------|--------------------|--------------------|
|                                 |                                                                       | [ $\mu\text{mol m}^{-2} \text{s}^{-1}$ ] |                     |                    |                    |
| <b>Wet season<br/>(Nov-Apr)</b> | Nov                                                                   | -0.25 (0.10)                             | -0.81 (0.10)        | 0.56 (0.03)        | 0.78 (0.01)        |
|                                 | Dec                                                                   | -0.48 (0.05)                             | -1.08 (0.04)        | 0.59 (0.01)        | 0.57 (0.01)        |
|                                 | Jan                                                                   | -0.94 (0.11)                             | -1.96 (0.11)        | 1.02 (0.02)        | 0.91 (0.01)        |
|                                 | Feb                                                                   | -1.52 (0.19)                             | -3.58 (0.20)        | 2.06 (0.03)        | 1.52 (0.02)        |
|                                 | Mar                                                                   | -2.23 (0.17)                             | -4.65 (0.17)        | 2.42 (0.02)        | 1.54 (0.01)        |
|                                 | Apr                                                                   | -1.32 (0.13)                             | -3.98 (0.13)        | 2.66 (0.02)        | 1.40 (0.01)        |
|                                 | <b>Average [<math>\mu\text{mol m}^{-2} \text{s}^{-1}</math>]</b>      | <b>-1.12 (0.30)</b>                      | <b>-2.68 (0.66)</b> | <b>1.55 (0.38)</b> | <b>1.12 (0.17)</b> |
|                                 | <b>Season sum [g C m<sup>-2</sup>]</b>                                | <b>-203 (9)</b>                          | <b>-482 (20)</b>    | <b>279 (11)</b>    | <b>202 (5)</b>     |
| <b>Rs/Re [%]</b>                |                                                                       |                                          |                     | <b>72 (13)</b>     |                    |
| <b>Dry season<br/>(May-Oct)</b> | May                                                                   | -0.55 (0.08)                             | -2.23 (0.08)        | 1.67 (0.02)        | 1.20 (0.01)        |
|                                 | Jun                                                                   | 0.50 (0.04)                              | -0.90 (0.04)        | 1.40 (0.02)        | 0.61 (0.01)        |
|                                 | Jul                                                                   | 0.29 (0.04)                              | -0.77 (0.03)        | 1.06 (0.01)        | 0.36 (0.01)        |
|                                 | Aug                                                                   | 0.45 (0.05)                              | -0.63 (0.04)        | 1.08 (0.02)        | 0.24 (0.01)        |
|                                 | Sep                                                                   | 0.25 (0.04)                              | -0.60 (0.04)        | 0.85 (0.02)        | 0.30 (0.01)        |
|                                 | Oct                                                                   | 0.26 (0.03)                              | -0.50 (0.02)        | 0.76 (0.01)        | 0.30 (0.01)        |
|                                 | <b>Average [<math>\mu\text{mol m}^{-2} \text{s}^{-1}</math>]</b>      | <b>0.20 (0.16)</b>                       | <b>-0.94 (0.26)</b> | <b>1.14 (0.14)</b> | <b>0.50 (0.15)</b> |
|                                 | <b>Season sum [g C m<sup>-2</sup>]</b>                                | <b>36 (5)</b>                            | <b>-173 (8)</b>     | <b>209 (4)</b>     | <b>93 (5)</b>      |
| <b>Rs/Re [%]</b>                |                                                                       |                                          |                     | <b>44 (7)</b>      |                    |
| <b>Annual</b>                   | <b>Average (SE) [<math>\mu\text{mol m}^{-2} \text{s}^{-1}</math>]</b> | <b>-0.46 (0.26)</b>                      | <b>-1.81 (0.43)</b> | <b>1.34 (0.20)</b> | <b>0.8 (0.1)</b>   |
|                                 | <b>Annual sum (SE) [g C m<sup>-2</sup> y<sup>-1</sup>]</b>            | <b>-167 (8)</b>                          | <b>-655 (13)</b>    | <b>488 (6)</b>     | <b>295 (4)</b>     |
|                                 | <b>Rs/Re [%]</b>                                                      |                                          |                     |                    | <b>60 (10)</b>     |

3

4 **Table S2** | Exponential and linear relationships between soil respiration rate (Rs;  $\mu\text{mol m}^{-2} \text{s}^{-1}$ ) and abiotic factors  
5 during 2015-2016. Ts ( $^{\circ}\text{C}$ ): soil temperature; SWC ( $\text{m}^3 \text{m}^{-3}$ ): soil water content; PAR ( $\mu\text{mol m}^{-2} \text{s}^{-1}$ ): incoming  
6 photosynthetic activity radiation above canopy. The best-fit model parameters ( $\beta_0$ ,  $\beta_1$ ,  $\beta_2$ , and  $\beta_3$ ) are reported for each  
7 model together with the squared coefficient of regression ( $R^2$ ), and the root mean squared error (RSME).

8 **a) Up-scaled daily time series (the models that used during Grünzweig et al., 2009)**

| Model                                                                      | Study     | $\beta_0$ | $\beta_1$ | $\beta_2$ | $\beta_3$ | $\beta_4$ | $R^2$ |
|----------------------------------------------------------------------------|-----------|-----------|-----------|-----------|-----------|-----------|-------|
| $\beta_0 + \beta_1\theta + \beta_2\text{PAR}$                              | 2000-2006 | -2.306    | 25.39     | 0.000545  |           |           | 0.83  |
| $\theta < 0.2 \text{ m}^3 \text{H}_2\text{O m}^{-3} \text{soil}$           | 2015-2016 | -0.7313   | 11.14     | 0.000564  |           |           | 0.43  |
| $\beta_0 + \beta_1 e^{\beta_2 \text{Ts}} + \beta_3 e^{\beta_4 \text{PAR}}$ | 2000-2006 | 1.394     | 0.1463    | 0.151     | 0.008408  | 0.003154  | 0.86  |
| $\theta < 0.2 \text{ m}^3 \text{H}_2\text{O m}^{-3} \text{soil}$           | 2015-2016 |           |           |           |           |           | 0.70  |

9 **b) Up-scaled half-hour time series**

| Model                                                                     | $\beta_0$ | $\beta_1$ | $\beta_2$ | $\beta_3$ | $R^2$ | SSE    |
|---------------------------------------------------------------------------|-----------|-----------|-----------|-----------|-------|--------|
| $\beta_0 + \beta_1 \text{Ts}$                                             | 1.264     | -0.02     |           |           | 0.07  | 0.556  |
| $\beta_0 e^{\beta_1 \text{Ts}}$                                           | 1.309     | -0.02     |           |           | 0.07  | 0.558  |
| $\beta_0 + \beta_1 \theta$                                                | 0.2934    | 5.57      |           |           | 0.35  | 0.4667 |
| $\beta_0 + \beta_1 \theta + \beta_2 \theta^2$                             | -0.2175   | 17.47     | -48.35    |           | 0.42  | 0.4388 |
| $e^{\beta_0 + \beta_1 \theta + \beta_2 \theta^2}$                         | -1.68     | 23.49     | -67.3     |           | 0.44  | 0.4378 |
| $\beta_0 + \beta_1 \text{PAR}$                                            | 0.7121    | 0.0002    |           |           | 0.05  | 0.5603 |
| $\beta_0 + \beta_1 \theta + \beta_2 \text{Ts}$                            | -0.4213   | 7.626     | 0.02473   |           | 0.40  | 0.4499 |
| $\beta_0 + \beta_1 \theta + \beta_2 \text{PAR}$                           | 0.1162    | 5.989     | 0.00028   |           | 0.44  | 0.4295 |
| $\beta_0 \beta_1^{((\text{Ts}-10)/10)} \theta \beta_2$                    | 6.714     | 1.655     | 1.083     |           | 0.52  | 0.4151 |
| $(\beta_0 / (1 + e^{\beta_1 * (\beta_2 - \text{Ts})})) * \theta \beta_3$  | 11.91     | 0.267     | 12.04     | 0.9908    | 0.54  | 0.3914 |
| $(\beta_0 / (1 + e^{\beta_1 * (\beta_2 - \text{PAR})})) * \theta \beta_3$ | 90.12     | 0.0004    | 8625      | 0.6838    | 0.50  | 0.4169 |
| $\beta_0 e^{\beta_1 \text{Ts}} e^{\beta_2 \theta + \beta_3 \theta^2}$     | 0.05126   | 0.04274   | 28.51     | 74.44     | 0.60  | 0.3932 |

10

11 **Table S3** | Annual heterotrophic respiration (Rh), autotrophic respiration (Ra), soil respiration (Rs), ecosystem  
 12 respiration (Re), gross primary productivity (GPP), net primary productivity (NPP), net ecosystem production (NEP;  
 13 from eddy covariance), respectively. The relative contribution of Rh, and Ra and Rs to Re, and the ecosystem and  
 14 soil carbon sequestration efficiency as CSE (NEP/GPP) and SCSE ( $\Delta C_{\text{soil}}/\text{GPP}$ ), where  $\Delta C_{\text{soil}}$  is the annual change of  
 15 soil carbon.

| Study                            | Rh                                   | Ra   | Rs   | Re   | GPP  | NPP | NEP | Rh/Re | Ra/Re | Rs/Re | CSE | SCSE |
|----------------------------------|--------------------------------------|------|------|------|------|-----|-----|-------|-------|-------|-----|------|
|                                  | [g m <sup>-2</sup> y <sup>-1</sup> ] |      |      |      |      |     |     | [%]   |       |       | [%] |      |
| <b>Semi-arid<sup>1</sup></b>     | 115                                  | 312  | 295  | 488  | 655  | 282 | 167 | 23    | 64    | 60    | 25  | 8.7  |
| <b>Europe, mean</b>              | 368                                  | 589  | 657  | 957  | 1107 | 518 | 150 | 38    | 62    | 69    | 14  | 1.8  |
| <b>Europe<sup>EN</sup>, mean</b> | 461                                  | 657  | 381  | 1117 | 1475 | 818 | 358 | 41    | 59    | 74    | 24  | 1.4  |
| <b>Boreal, global</b>            | 301                                  | 561  | 411  | 862  | 982  | 381 | 116 | 35    | 65    | 48    | 12  | 0.7  |
| <b>Temperate, global</b>         | 420                                  | 730  | 773  | 1150 | 1461 | 669 | 306 | 37    | 64    | 67    | 21  | 1.4  |
| <b>Tropical, global</b>          | 877                                  | 2184 | 1412 | 3061 | 3351 | 864 | 403 | 29    | 71    | 46    | 12  | 0.3  |

16 <sup>1</sup> This study from November 2015 to October 2016. <sup>EN</sup> Evergreen needleleaf forests. References for all other  
 17 vegetation types appear in the SI.

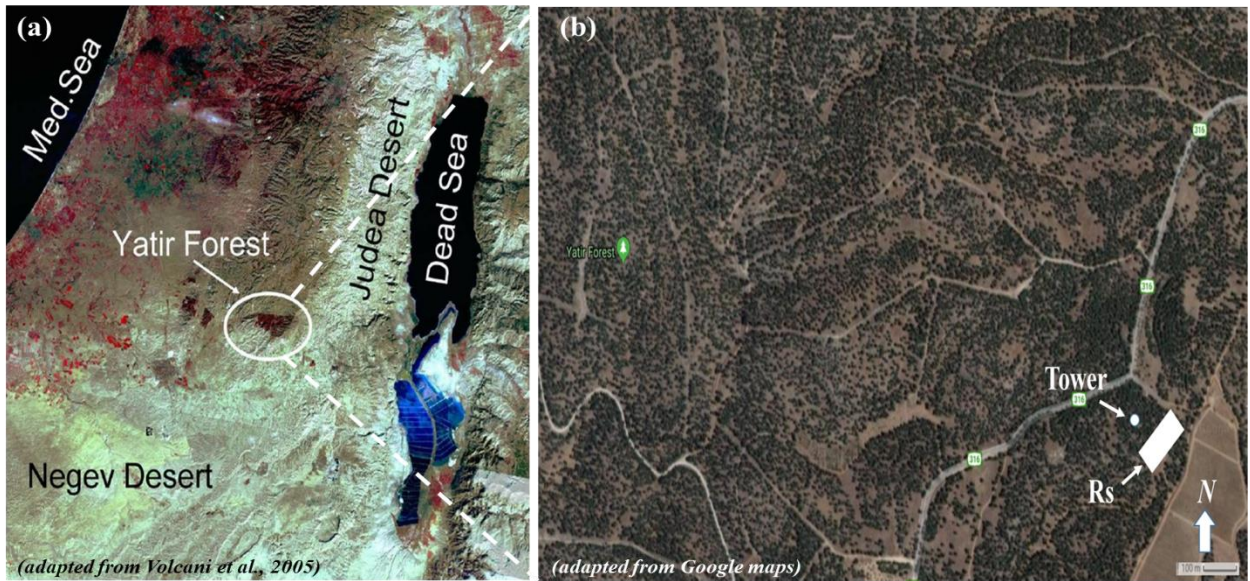

18

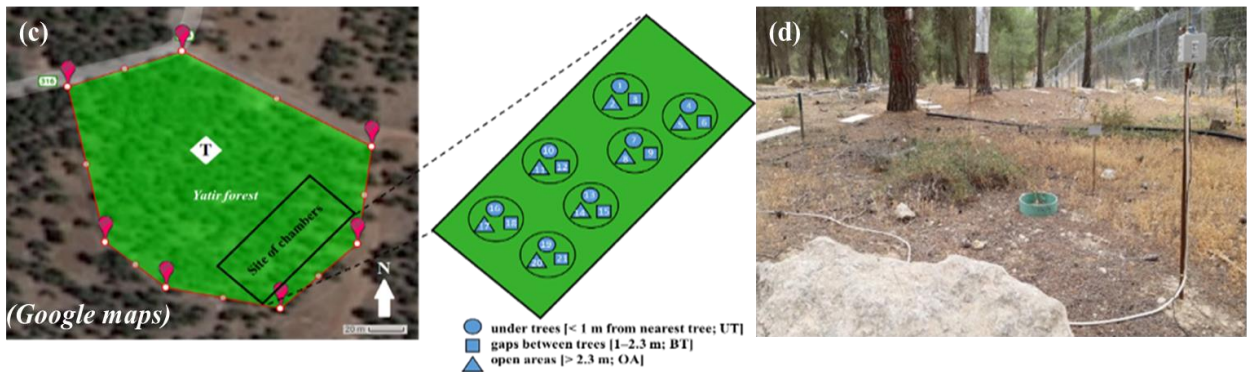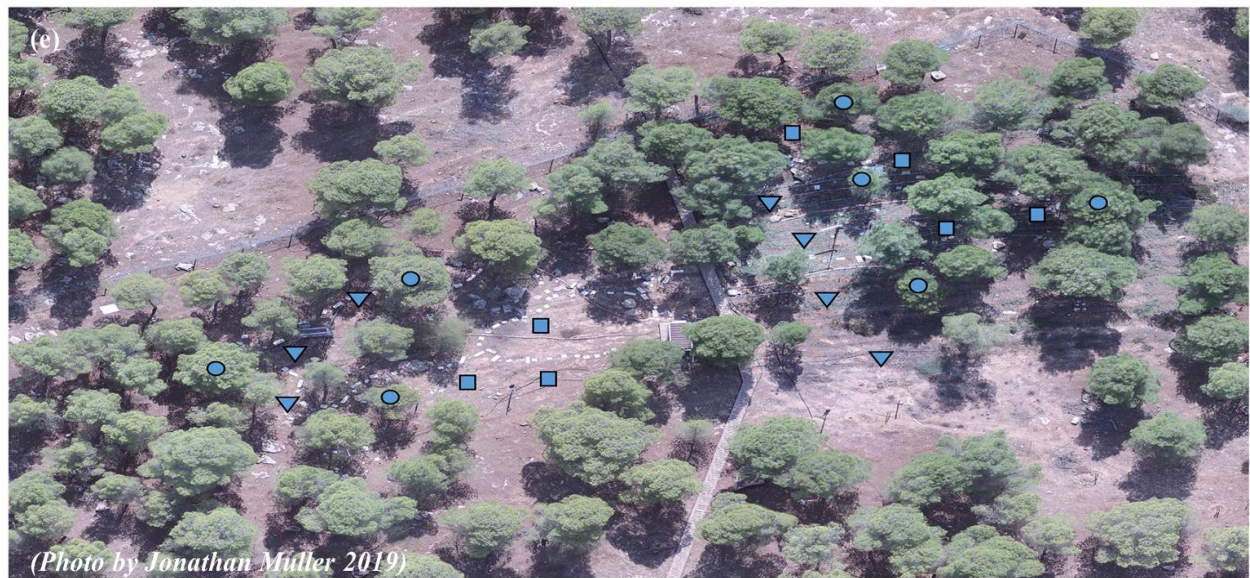

19

20 **Figure S1** | (a) Landsat-TM image of Central Israel, (b) Map of the experimental set-up at the *Pinus halepensis*  
 21 Yatir forest with white rectangle for soil respiration (Rs) measurements and white dot is the eddy covariance tower  
 22 (NEE), c, d, and e) Photographs showing conditions of locations, site, and the schematic diagrams describing  
 23 experiment design.

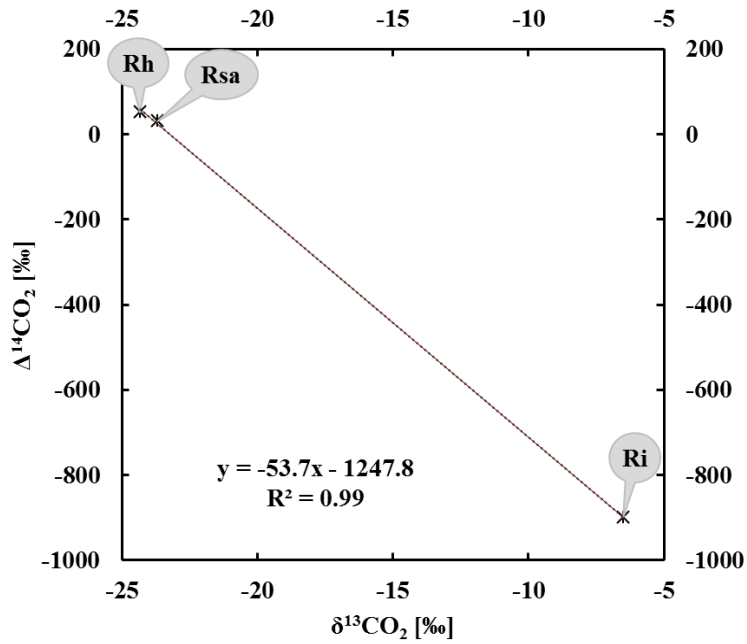

24  
 25 **Figure S2** | The linear regression line used to estimate the  $\Delta^{14}\text{C}$  of Rs. The line (dotted) was produced by the  
 26 correlation between the average of the measured  $\delta^{13}\text{C}$  values of Rsa, Rsh, and the  $\delta^{13}\text{C}$  Ri (all from incubation  
 27 measurements), and the  $\Delta^{14}\text{C}$  values estimated based on measured  $\Delta^{14}\text{C}$  at our site (Carmi et al. 2013) adjusted to the  
 28 present study period and the mean accepted ages of autotrophic and heterotrophic soil organic material (Graven et  
 29 al., 2012; Levin et al., 2010; Taylor et al., 2015).

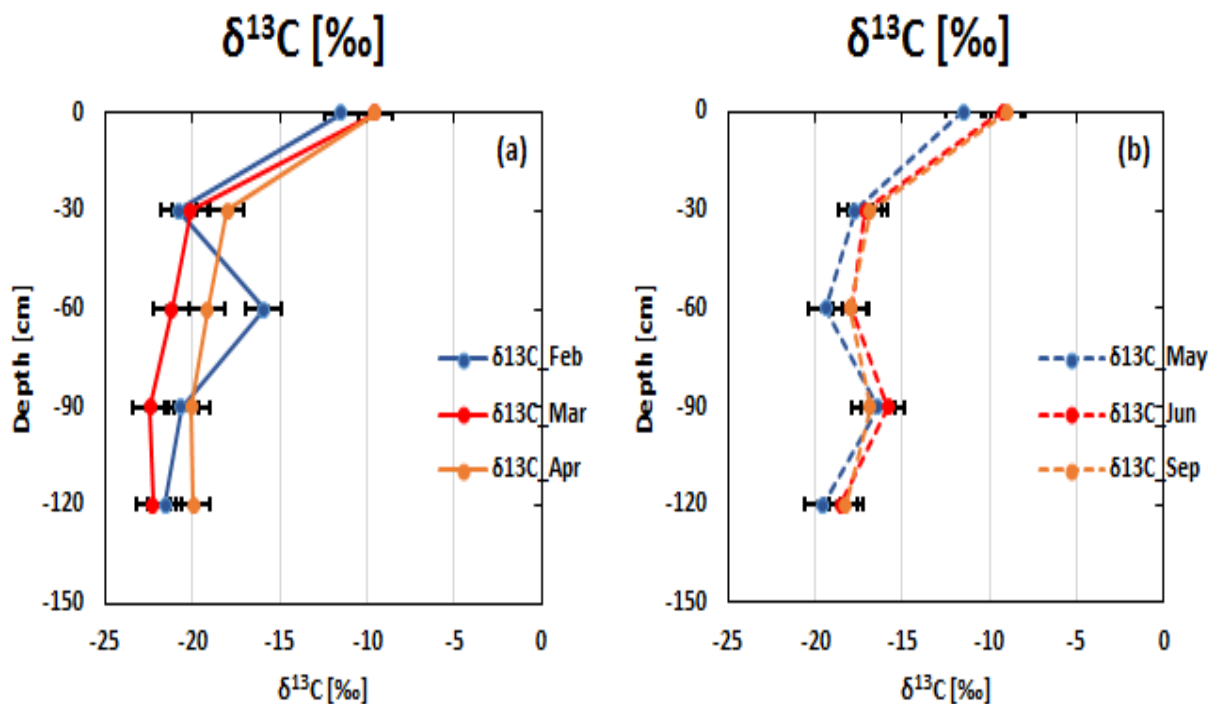

30  
 31 **Figure S3** | Monthly averages of  $\delta^{13}\text{C}$  (‰) from the soil  $\text{CO}_2$  profile (at 0, 30, 60, 90, and 120 cm soil depth) during  
 32 some campaigns in 2016 to determine the seasonal variations in the relative contribution of soil autotrophic (Rsa),  
 33 heterotrophic (Rh), and abiotic (Ri) components to Rs.

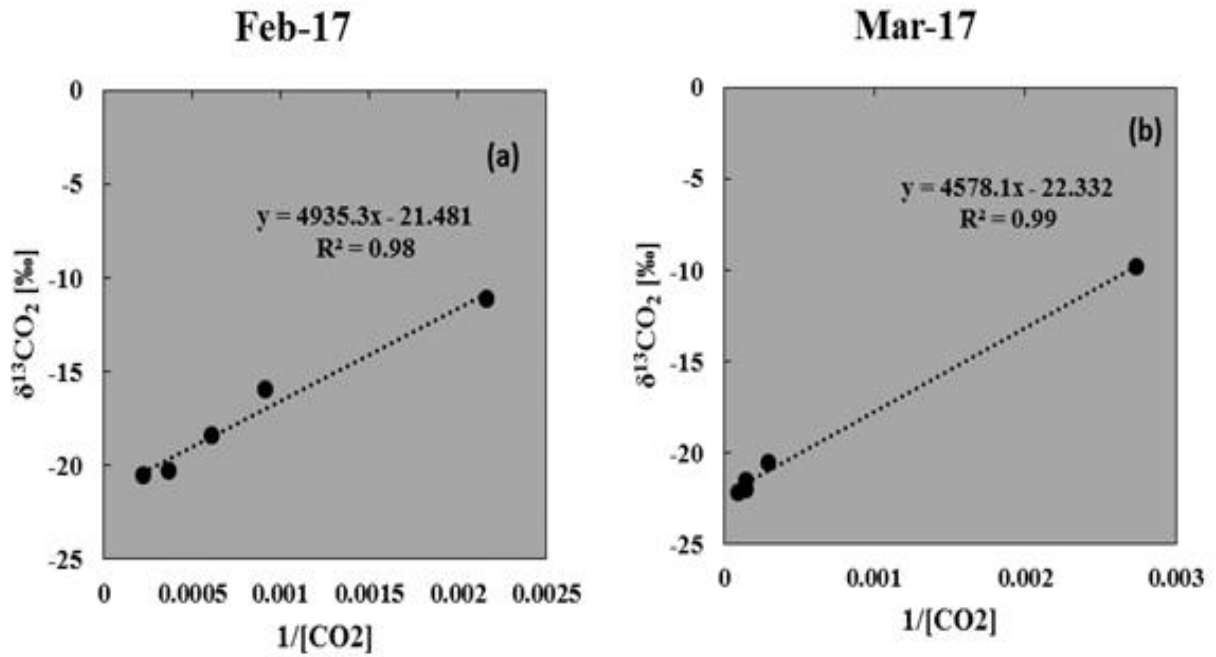

34  
 35 **Figure S4** | Keeling plot for soil CO<sub>2</sub> profile (at 0, 30, 60, 90, and 120 cm soil depth) during some campaigns in  
 36 2016 to determine the seasonal variations in the relative contribution of soil autotrophic (R<sub>sa</sub>), heterotrophic (R<sub>h</sub>),  
 37 and abiotic (R<sub>i</sub>) components to R<sub>s</sub>.

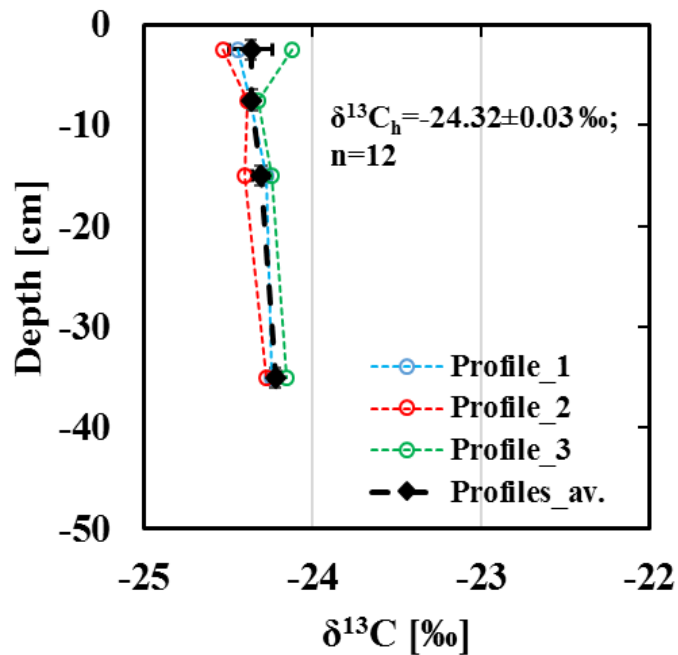

38  
 39 **Figure S5** | δ<sup>13</sup>C of soil organics profile with depth (at 0-5, 5-10, 10-20, and 20-50 cm soil depth) from three sites  
 40 during some campaigns in 2016 to determine the relative contribution of soil heterotrophic (R<sub>h</sub>) to R<sub>s</sub> (STDEV of  
 41 the 12 samples = 0.12‰).

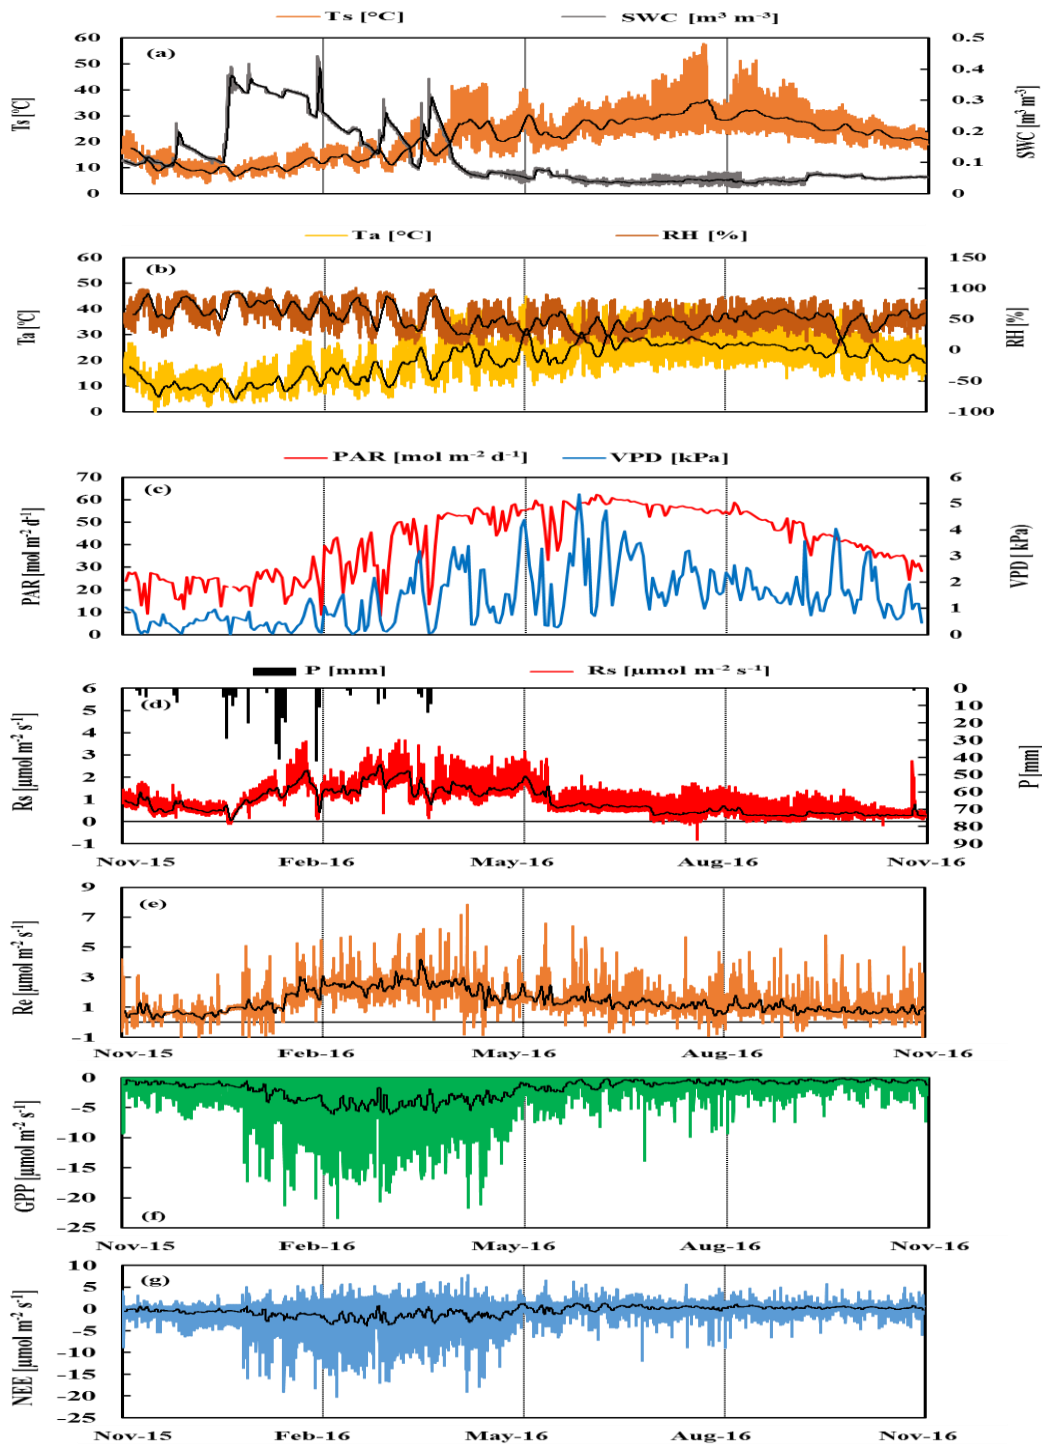

49 **Figure S6** | a) half-hour values for soil temperature 5 cm ( $T_s$ ) and soil water content 10 cm ( $SWC_{0-10cm}$ ), b) half-  
50 hour values for the air temperature at 20 cm ( $T_a$ ) and relative humidity at 20 cm (RH), c) daily average of incoming  
51 photosynthetic activity radiation above canopy (PAR) and vapour pressure deficit (VPD), half-hour values for the  
52 following  $CO_2$  fluxes d) up-scaled  $R_s$ , e) ecosystem respiration (Re), f) gross primary production (GPP), and g) net  
53 ecosystem exchange (NEE). Black lines are a running average for a window of 2 days. Vertical dotted lines indicate  
54 the winter, spring, summer and autumn seasons.



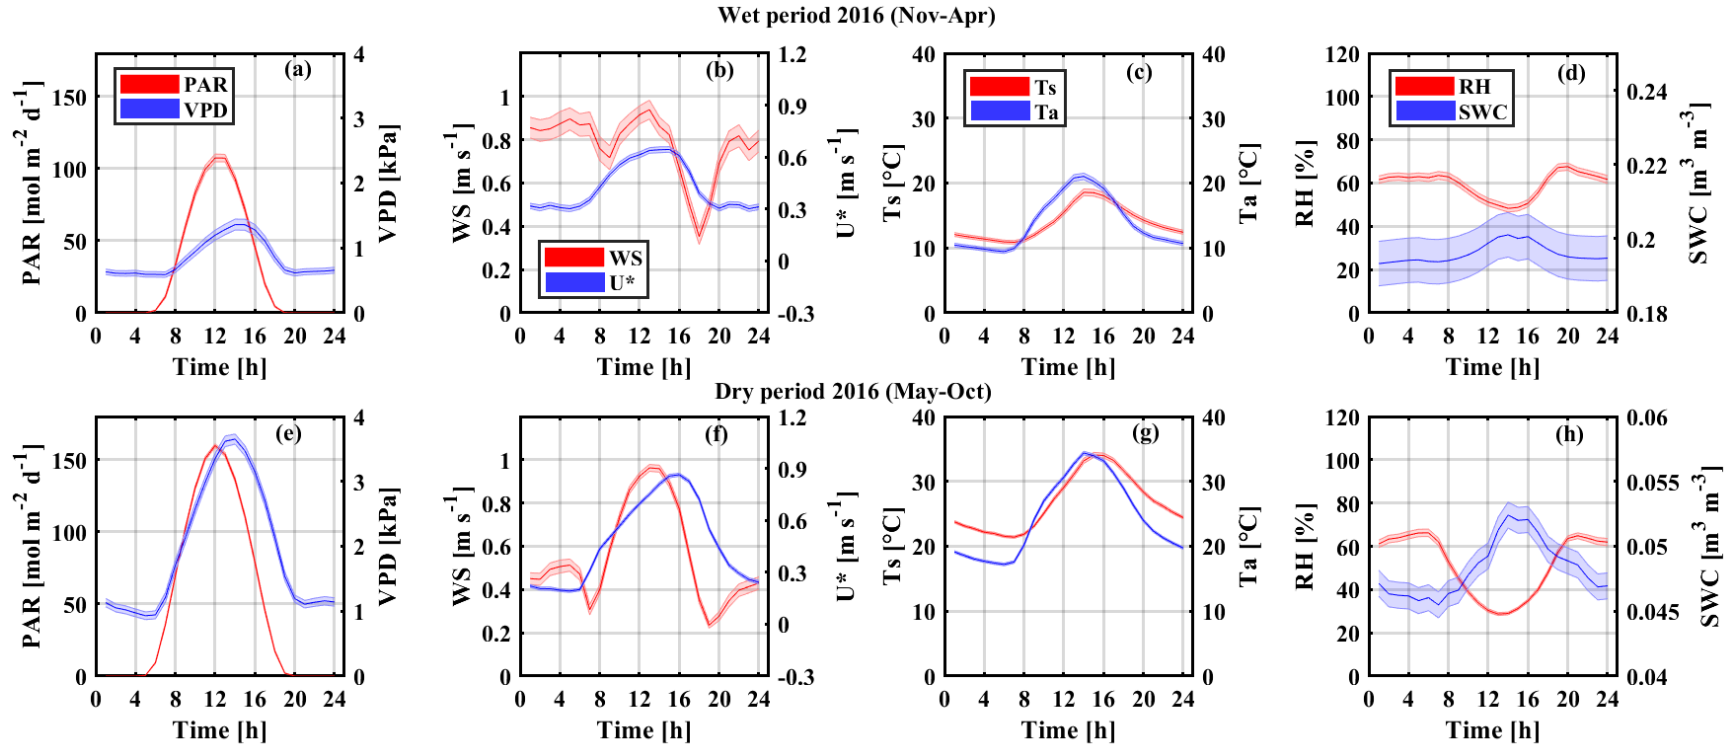

55

56 **Figure S7** | Typical diurnal cycle of the meteorological parameters during the wet period (Nov.-Apr.; upper panels) and for the dry period (May-Oct.; lower panels); each set  
 57 includes six months of half-hour measurements. a and e) incoming photosynthetic activity radiation above canopy (PAR) and vapour pressure deficit (VPD), b and f)  
 58 wind speed (WS) and covariation of friction velocity ( $U^*$ ), c and g) soil temperature at 5 cm ( $T_s$ ) and air temperature at 20 cm ( $T_a$ ), and d and h) relative humidity (RH) and soil  
 59 water content at the top 10 cm (SWC0-10cm). Shaded areas indicate  $\pm se$ .

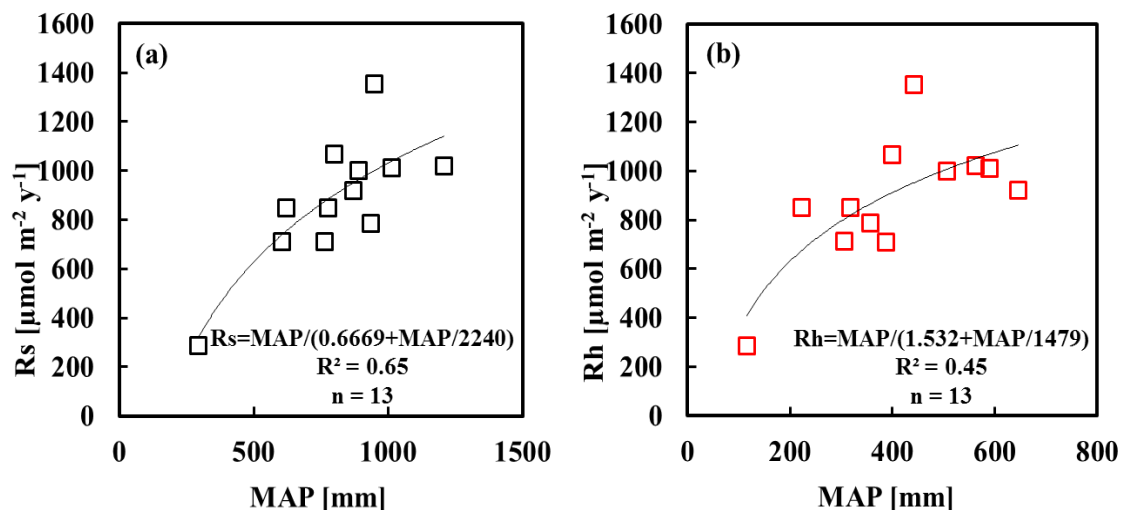

60

61 **Figure S8** | An asymptotic function based on the Michaelis-Menten equation (Kool et al., 2007) was fit to a) Rs or  
 62 b) Rh vs. MAP from the European Evergreen needleleaf data as follows:  $R_s = \text{MAP} / (0.6669 + \text{MAP}/2240)$ ,  $R^2 =$   
 63  $0.65$ ,  $p < 0.01$ ,  $n=13$  (Flechard et al., 2019a).

#### 64 **Supplementary References (used for data in SI and Table S3)**

65

- 66 1. Etzold, S., Ruehr, N. K., Zweifel, R., Dobbertin, M., Zingg, A., Pluess, P., Hasler, R., Eugster, W., and  
 67 Buchmann, N.: The Carbon Balance of Two Contrasting Mountain Forest Ecosystems in Switzerland: Similar  
 68 Annual Trends, but Seasonal Differences, *Ecosystems*, 14, 1289-1309, 10.1007/s10021-011-9481-3, 2011.
- 69 2. Flechard, C. R., Ibrom, A., Skiba, U. M., de Vries, W., van Oijen, M., Cameron, D. R., Dise, N. B., Korhonen,  
 70 J. F. J., Buchmann, N., Legout, A., Simpson, D., Sanz, M. J., Aubinet, M., Loustau, D., Montagnani, L.,  
 71 Neiryneck, J., Janssens, I. A., Pihlatie, M., Kiese, R., Siemens, J., Francez, A.-J., Augustin, J., Varlagin, A.,  
 72 Olejnik, J., Juszczak, R., Aurela, M., Chojnicki, B. H., Dämmgen, U., Djuricic, V., Drewer, J., Eugster, W.,  
 73 Fauvel, Y., Fowler, D., Frumau, A., Granier, A., Gross, P., Hamon, Y., Helfter, C., Hensen, A., Horváth, L.,  
 74 Kitzler, B., Kruijt, B., Kutsch, W. L., Lobo-do-Vale, R., Lohila, A., Longdoz, B., Marek, M. V., Matteucci, G.,  
 75 Mitosinkova, M., Moreaux, V., Neftel, A., Ourcival, J.-M., Pilegaard, K., Pita, G., Sanz, F., Schjoerring, J. K.,  
 76 Sebastià, M.-T., Tang, Y. S., Uggerud, H., Urbaniak, M., van Dijk, N., Vesala, T., Vidic, S., Vincke, C.,  
 77 Weidinger, T., Zechmeister-Boltenstern, S., Butterbach-Bahl, K., Nemitz, E., and Sutton, M. A.:  
 78 Carbon/nitrogen interactions in European forests and semi-natural vegetation. Part I: Fluxes and budgets of  
 79 carbon, nitrogen and greenhouse gases from ecosystem monitoring and modelling, *Biogeosciences Discuss.*,  
 80 <https://doi.org/10.5194/bg-2019-333>, in review, 2019a.
- 81 3. Flechard, C. R., van Oijen, M., Cameron, D. R., de Vries, W., Ibrom, A., Buchmann, N., Dise, N. B., Janssens,  
 82 I. A., Neiryneck, J., Montagnani, L., Varlagin, A., Loustau, D., Legout, A., Ziemblińska, K., Aubinet, M., Aurela,  
 83 M., Chojnicki, B. H., Drewer, J., Eugster, W., Francez, A.-J., Juszczak, R., Kitzler, B., Kutsch, W. L., Lohila,  
 84 A., Longdoz, B., Matteucci, G., Moreaux, V., Neftel, A., Olejnik, J., Sanz, M. J., Siemens, J., Vesala, T., Vincke,  
 85 C., Nemitz, E., Zechmeister-Boltenstern, S., Butterbach-Bahl, K., Skiba, U. M., and Sutton, M. A.:  
 86 Carbon/nitrogen interactions in European forests and semi-natural vegetation. Part II: Untangling climatic,  
 87 edaphic, management and nitrogen deposition effects on carbon sequestration potentials, *Biogeosciences*  
 88 *Discuss.*, <https://doi.org/10.5194/bg-2019-335>, in review, 2019b.
- 89 4. Hursh, A., Ballantyne, A., Cooper, L., Maneta, M., Kimball, J., and Watts, J.: The sensitivity of soil respiration  
 90 to soil temperature, moisture, and carbon supply at the global scale, *Global Change Biology*, 23, 2090-2103,  
 91 10.1111/gcb.13489, 2017.
- 92 5. Schulze, E. D., Luyssaert, S., Ciais, P., Freibauer, A., Janssens, I. A., Soussana, J. F., Smith, P., Grace, J., Levin,  
 93 I., Thiruchittampalam, B., Heimann, M., Dolman, A. J., Valentini, R., Bousquet, P., Peylin, P., Peters, W.,  
 94 Rodenbeck, C., Etiope, G., Vuichard, N., Wattenbach, M., Nabuurs, G. J., Poussi, Z., Nieschulze, J., Gash, J. H.,  
 95 and CarboEurope, T.: Importance of methane and nitrous oxide for Europe's terrestrial greenhouse-gas balance,

- 96 Nature Geoscience, 2, 842-850, 10.1038/ngeo686, 2009.
- 97 6. Avitabile, V., and Camia, A.: An assessment of forest biomass maps in Europe using harmonized national  
98 statistics and inventory plots, *Forest Ecology and Management*, 409, 489-498, 10.1016/j.foreco.2017.11.047,  
99 2018.
- 100 7. De Vos, B., Cools, N., Ilvesniemi, H., Vesterdal, L., Vanguelova, E., and Camicelli, S.: Benchmark values for  
101 forest soil carbon stocks in Europe: Results from a large scale forest soil survey, *Geoderma*, 251, 33-46,  
102 10.1016/j.geoderma.2015.03.008, 2015.
- 103 8. Luysaert, S., Inghima, I., Jung, M., Richardson, A. D., Reichstein, M., Papale, D., Piao, S. L., Schulzes, E. D.,  
104 Wingate, L., Matteucci, G., Aragao, L., Aubinet, M., Beers, C., Bernhofer, C., Black, K. G., Bonal, D.,  
105 Bonnefond, J. M., Chambers, J., Ciais, P., Cook, B., Davis, K. J., Dolman, A. J., Gielen, B., Goulden, M., Grace,  
106 J., Granier, A., Grelle, A., Griffis, T., Grunwald, T., Guidolotti, G., Hanson, P. J., Harding, R., Hollinger, D. Y.,  
107 Hutyra, L. R., Kolar, P., Kruijt, B., Kutsch, W., Lagergren, F., Laurila, T., Law, B. E., Le Maire, G., Lindroth,  
108 A., Loustau, D., Malhi, Y., Mateus, J., Migliavacca, M., Misson, L., Montagnani, L., Moncrieff, J., Moors, E.,  
109 Munger, J. W., Nikinmaa, E., Ollinger, S. V., Pita, G., Rebmann, C., Roupsard, O., Saigusa, N., Sanz, M. J.,  
110 Seufert, G., Sierra, C., Smith, M. L., Tang, J., Valentini, R., Vesala, T., and Janssens, I. A.: CO2 balance of  
111 boreal, temperate, and tropical forests derived from a global database, *Global Change Biology*, 13, 2509-2537,  
112 10.1111/j.1365-2486.2007.01439.x, 2007.
- 113 9. Pan, Y. D., Birdsey, R. A., Fang, J. Y., Houghton, R., Kauppi, P. E., Kurz, W. A., Phillips, O. L., Shvidenko, A.,  
114 Lewis, S. L., Canadell, J. G., Ciais, P., Jackson, R. B., Pacala, S. W., McGuire, A. D., Piao, S. L., Rautiainen,  
115 A., Sitch, S., and Hayes, D.: A Large and Persistent Carbon Sink in the World's Forests, *Science*, 333, 988-993,  
116 10.1126/science.1201609, 2011.
- 117 10. Kool, D. M., Chung, H. G., Tate, K. R., Ross, D. J., Newton, P. C. D., and Six, J.: Hierarchical saturation of soil  
118 carbon pools near a natural CO2 spring, *Global Change Biology*, 13, 1282-1293, 10.1111/j.1365-  
119 2486.2007.01362.x, 2007.
- 120 11. Volcani, A., Karnieli, A., and Svoray, T.: The use of remote sensing and GIS for spatio-temporal analysis of the  
121 physiological state of a semi-arid forest with respect to drought years, *Forest Ecology and Management*, 215,  
122 239-250, 10.1016/j.foreco.2005.05.063, 2005.
